# Supplementary material for: The role of tryptophans in the UV-B absorption of a UVR8 photoreceptor – a computational study
Source: Royal Society of Chemistry journal article supplement (doi:10.1039/c4cp06073c), 2015-01-01
Supplement: c4cp06073c1.pdf [file c4cp06073c1.pdf]

## Supporting Information

### **Role of Tryptophans in UV-B Absorption of UVR8 Photoreceptor – A Computational Study**

Qi Wu,<sup>1</sup> Bolong Huang<sup>1</sup>, T.A. Niehaus,<sup>2</sup> Xiaojing Yang<sup>3</sup>, Jun Fan<sup>1\*</sup>, and Rui-Qin Zhang<sup>1\*</sup>

*<sup>1</sup>Department of Physics and Materials Science, City University of Hong Kong,*

*Hong Kong SAR, China*

*<sup>2</sup>Institute I - Theoretical Physics, University of Regensburg, D-93040 Regensburg, Germany*

*<sup>3</sup>Department of Chemistry, University of Illinois,*

*Chicago, IL 60607, USA*

\* To whom correspondence should be addressed. E-mail: [aprqz@cityu.edu.hk](mailto:aprqz@cityu.edu.hk);  
[junfan@cityu.edu.hk](mailto:junfan@cityu.edu.hk)

Table S1. Calculated transition energies and oscillator strengths for tryptophan dimer W285 and W337 in the gas phase,  $\Delta E$  means the transition energy, and  $f$  stands for the oscillator strength.

|       | TD-DFTB         |       | B3LYP/6-31+G(d,p) |       |
|-------|-----------------|-------|-------------------|-------|
|       | $\Delta E$ (eV) | $f$   | $\Delta E$ (eV)   | $f$   |
| $L_b$ | 4.13            | 0.073 | 4.29              | 0.040 |
| $L_a$ | 4.59            | 0.033 | 4.74              | 0.021 |

## Captions for figures

Fig. S1. Absorption spectra<sup>22</sup> of (a) W198, (b) W250 and (c) W302 for differently substituted models.

Fig. S2. Absorption spectra<sup>22</sup> of (a) M1, (b) M2, (c) M3, (d) M4, (e) M5, (f) M6, (g) M8 and (h) M9 for distal Trps, interfacial Trps, and interfacial Trps with neighboring residues included.

Fig. S3. Absorption spectra<sup>22</sup> of amino acids apart from tryptophan contained in UVR8.

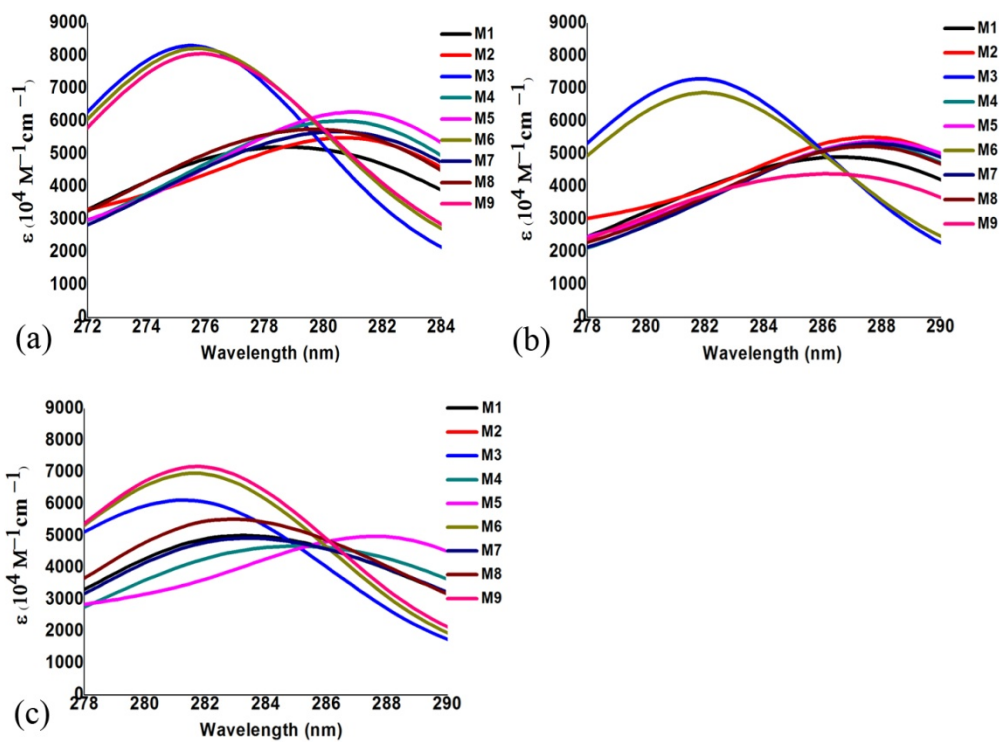

Fig. S1. Absorption spectra<sup>22</sup> of (a) W198, (b) W250 and (c) W302 for differently substituted models.

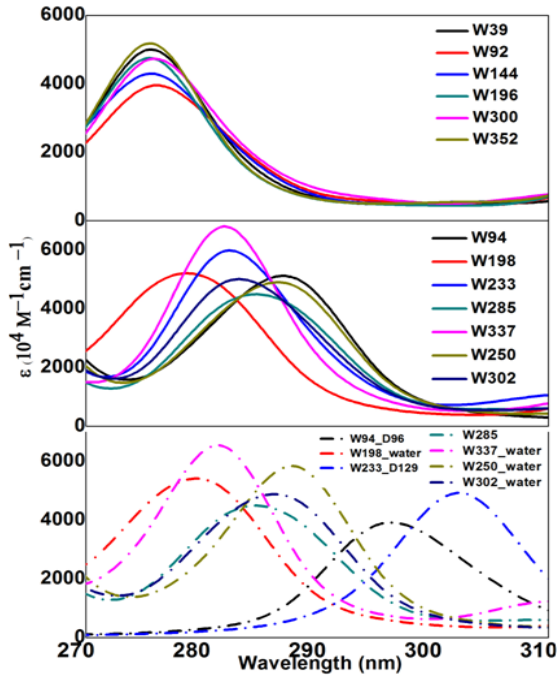

(a)

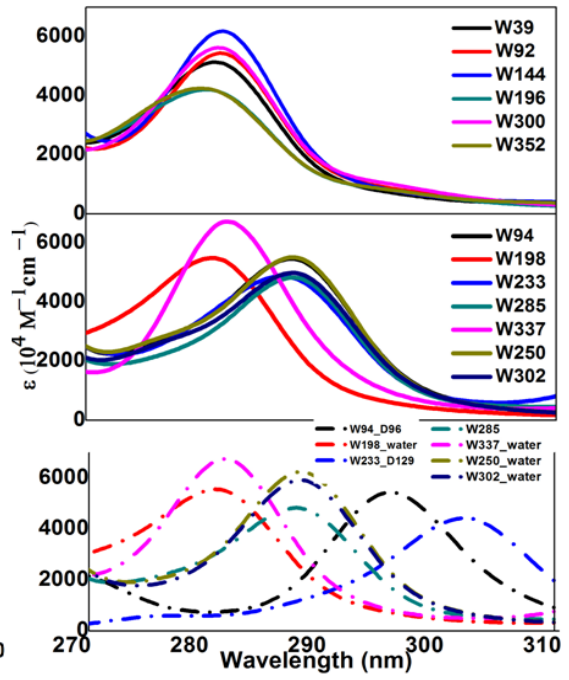

(b)

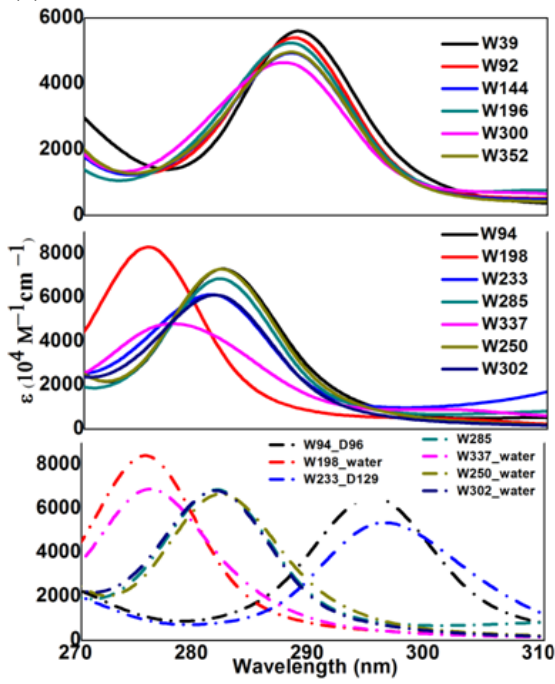

(c)

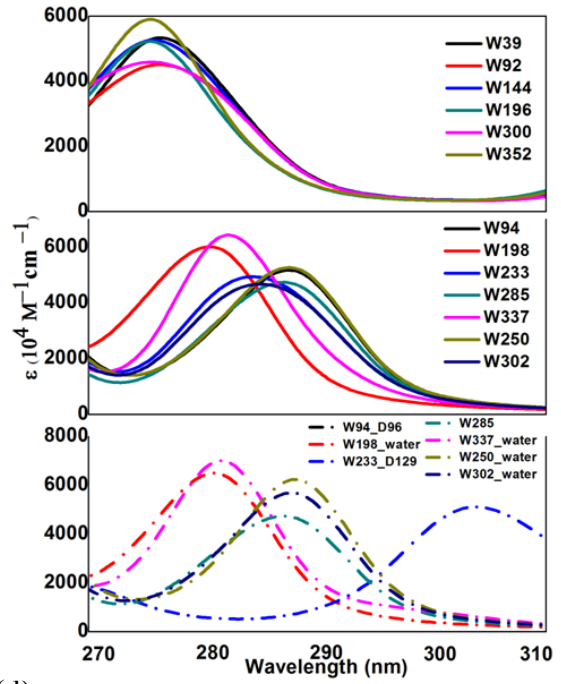

(d)

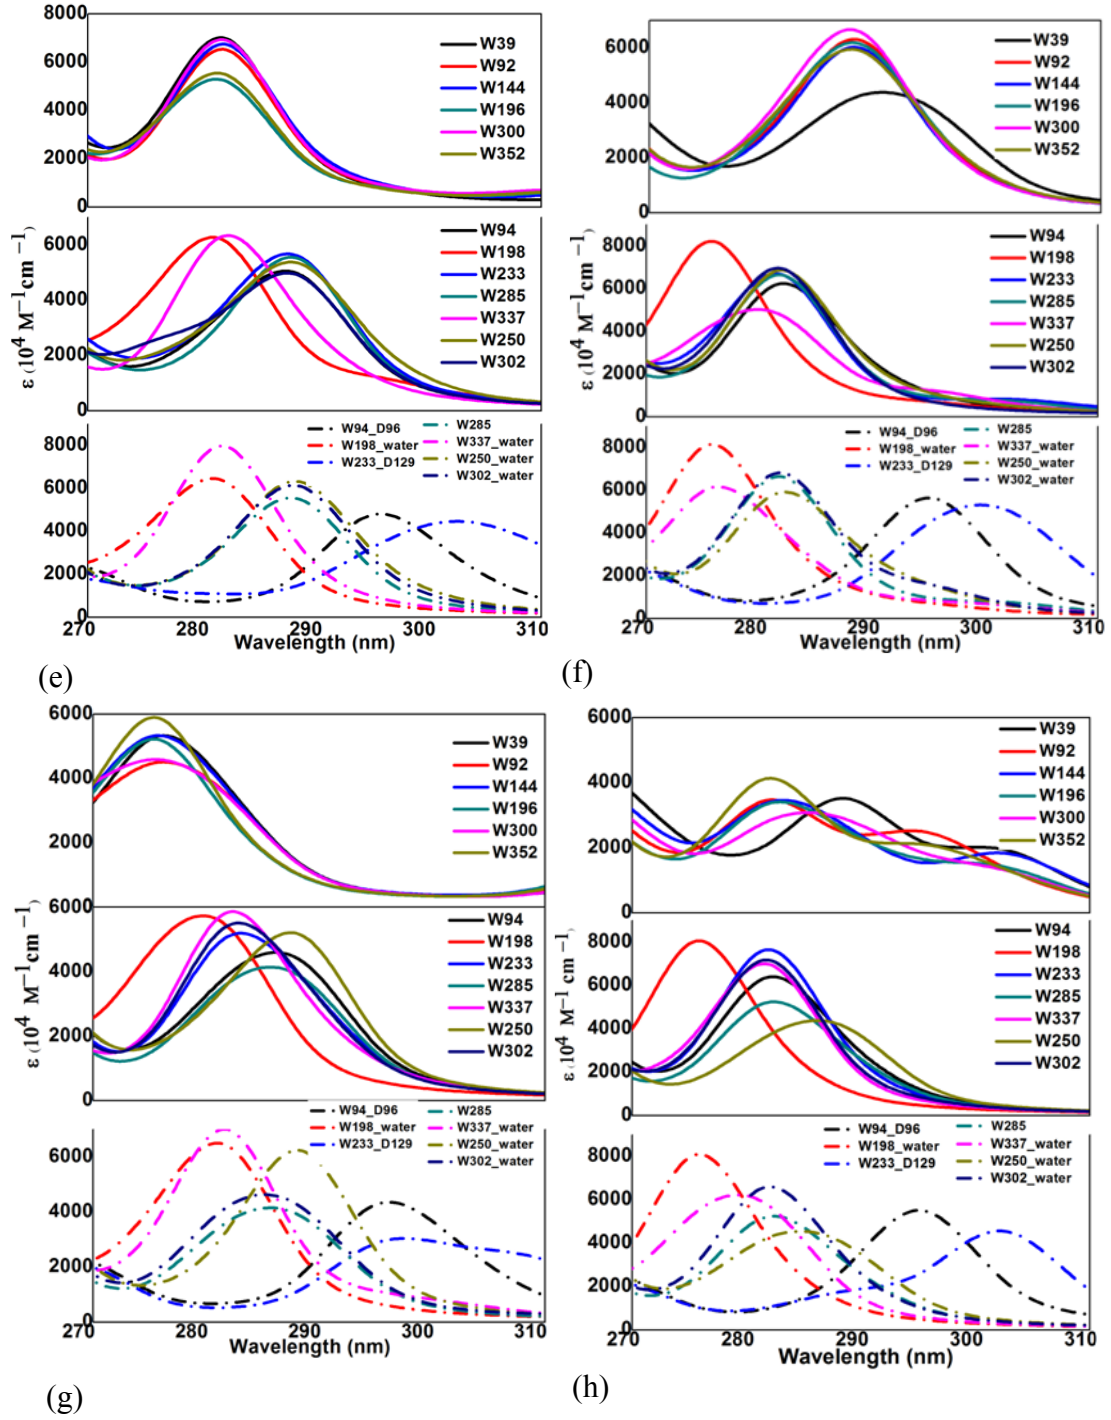

Fig. S2. Absorption spectra<sup>22</sup> of (a) M1, (b) M2, (c) M3, (d) M4, (e) M5, (f) M6, (g) M8 and (h) M9 for distal Trps, interfacial Trps, and interfacial Trps with neighboring residues included.

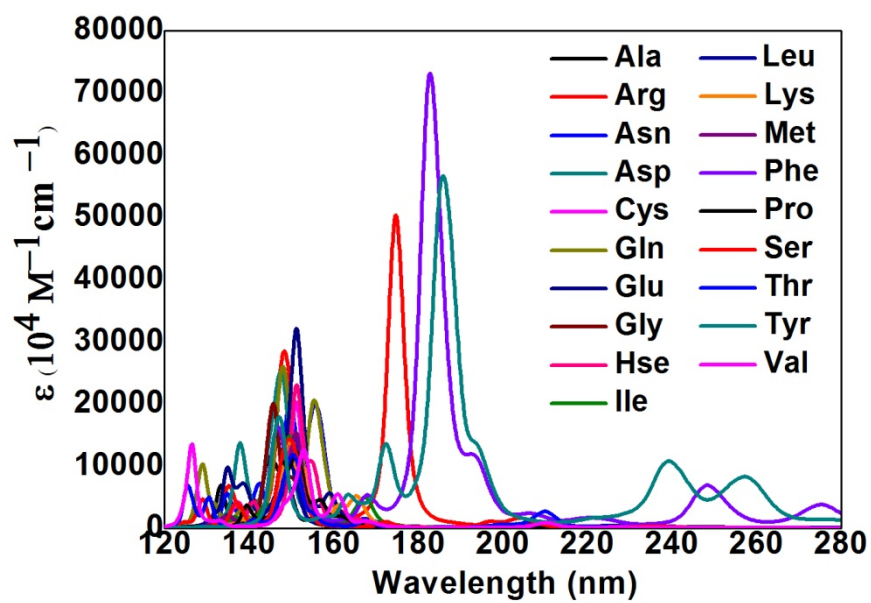

Fig. S3. Absorption spectra<sup>22</sup> of amino acids apart from tryptophan contained in UVR8.
